# Supplementary material for: Template directed synthesis of mesoporous ZnO having high porosity and enhanced optoelectronic properties
Source: Royal Society of Chemistry journal article supplement (doi:10.1039/b901941c), 2009-01-01
Supplement: b901941c.pdf [file b901941c.pdf]

## Template directed synthesis of mesoporous ZnO having high porosity and optoelectronic properties

Debraj Chandra, Subrata Mridha, Durga Basak and Asim Bhaumik\*

### Supplementary Information

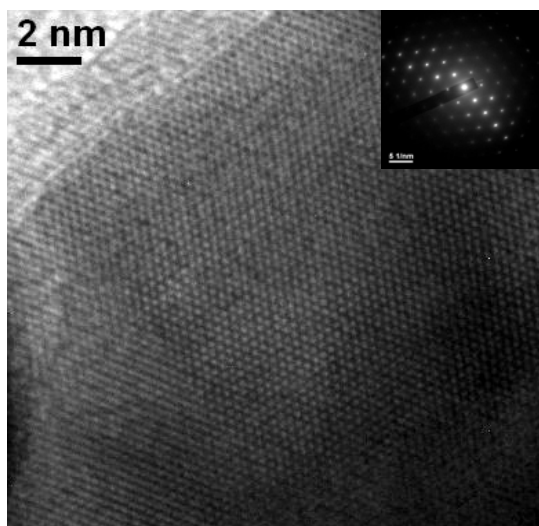

**S1:** Transmission electron micrograph of bulk ZnO (sample 2). Respective electron diffraction patterns are shown in the inset suggesting hexagonal lattice.

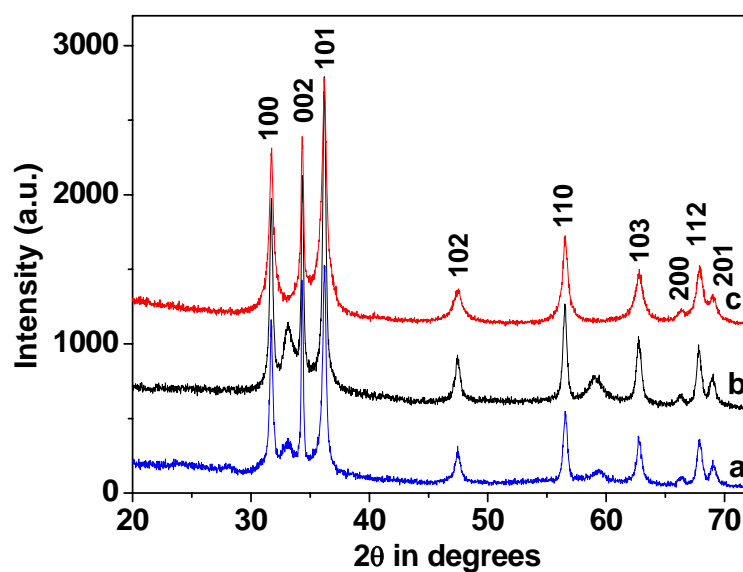

**S2:** Wide angle XRD pattern of as-synthesized (a) and template-free (b) sample 1 and bulk ZnO (sample 2, c). As synthesized sample showed impurity  $\text{Zn(OH)}_2$  phase along with ZnO, whereas when mesoporous ZnO (sample 1) and nonporous ZnO (sample 2) materials are heated at 418 K it transforms completely into nanocrystalline ZnO.

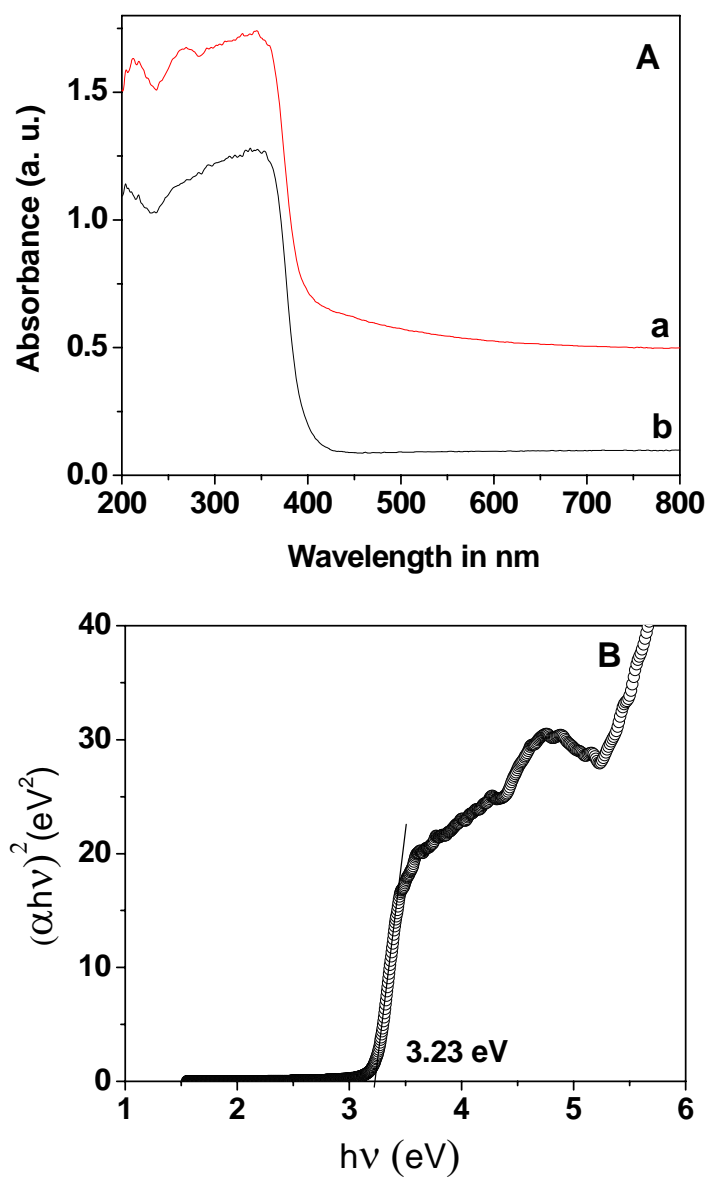

**S3:** A: UV-vis diffuse reflectance spectra of SDA-free mesoporous ZnO (sample1, a) bulk ZnO (sample 2, b). B: Direct band gap calculated from absorbance value for mesoporous ZnO.

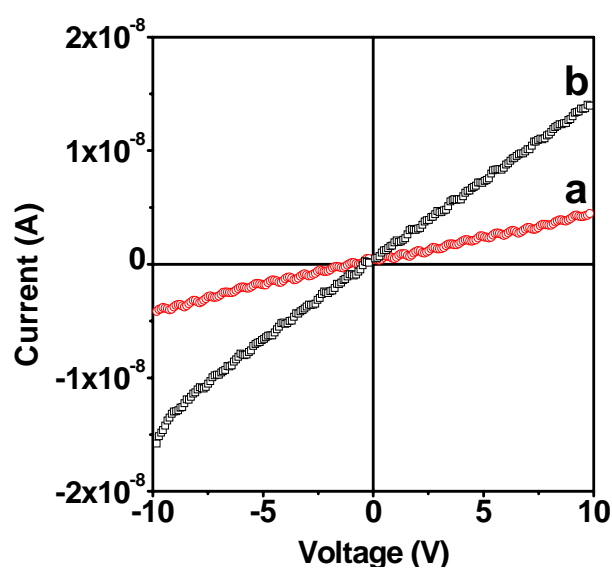

**S4:** Current-voltage (I-V) characteristics of the mesoporous ZnO (sample 1, a) bulk ZnO (sample 2, b). For electrical measurements, first a pellet (8 mm diameter) was prepared using a pelletizer under a pressure of 7 tonnes/cm<sup>2</sup> from 0.4 g of powder of each samples. For the purpose of D. C. current measurements, gold metal (Sigma-Aldrich, 99.99%) electrodes were deposited in circular form of diameter 2 mm on the surfaces of the pellets. The dark current-voltage (I-V) measurements were done by keeping the sample in dark for several hours and measuring the D.C. current between the two contacts using Keithley source meter (model: 2400).
